# Supplementary material
Source: PubMed Central journal article supplement (PMC7322945)
Supplement: advancesADV2020001984-suppl1.pdf [file advancesADV2020001984-suppl1.pdf]

## Supplementary material

**Table S1:** Baseline characteristics

|                                      | <b>N = 213</b> |
|--------------------------------------|----------------|
| <b>Age (years)</b>                   |                |
| <b>Mean (SD)</b>                     | 50 (15)        |
| <b>Range</b>                         | 18-73          |
| <b>Underlying disease, n (%)</b>     |                |
| <b>Acute leukemia</b>                | 141 (66)       |
| <b>MDS</b>                           | 28 (13)        |
| <b>Non-Hodgkin lymphoma</b>          | 16 (8)         |
| <b>Others</b>                        | 28 (13)        |
| <b>Conditioning intensity, n (%)</b> |                |
| <b>Myeloablative</b>                 | 106 (50)       |
| <b>Reduced intensity</b>             | 107 (50)       |
| <b>Conditioning regimen, n (%)</b>   |                |
| <b>Flu/Cy/TBI (13.2 Gy)</b>          | 69 (32)        |
| <b>Cy/TBI (13.2 Gy)</b>              | 27 (13)        |
| <b>Flu/Cy/TBI (2 Gy)</b>             | 97 (46)        |
| <b>Others</b>                        | 20 (9)         |
| <b>GVHD prophylaxis, n (%)</b>       |                |
| <b>CNI + MMF</b>                     | 155 (73)       |
| <b>Sirolimus + MMF</b>               | 28 (13)        |
| <b>CNI + Methotrexate</b>            | 22 (10)        |
| <b>Others</b>                        | 8 (4)          |

CNI: Calcineurin inhibitor; Cy: Cyclophosphamide; Flu: Fludarabine; MDS: Myelodysplastic syndrome; MMF: Mycophenolate mofetil; SD: Standard deviation; TBI: Total body irradiation

**Table S2:** Antibiotic exposures and CMV reactivation in univariate analysis

|                                                               | <b>HR (95%CI)</b> | <b>P</b> |
|---------------------------------------------------------------|-------------------|----------|
| <b><i>Antibiotic exposures by day +14 (binary)</i></b>        |                   |          |
| <b>Fluoroquinolones</b>                                       | 1.20 (0.55-2.60)  | 0.64     |
| <b>Third or higher generation cephalosporins</b>              | 1.21 (0.76-1.93)  | 0.43     |
| <b>Vancomycin</b>                                             | 1.84 (1.16-2.91)  | 0.01     |
| <b>Piperacillin-Tazobactam</b>                                | 0.88 (0.51-1.52)  | 0.65     |
| <b>Carbapenems</b>                                            | 1.31 (0.81-2.14)  | 0.27     |
| <b>Metronidazole</b>                                          | 1.08 (0.62-1.90)  | 0.78     |
| <b>Clindamycin</b>                                            | 0.52 (0.24-1.14)  | 0.10     |
| <b><i>Antibiotic exposures by day +100 (time-varying)</i></b> |                   |          |
| <b>Fluoroquinolones</b>                                       | 1.50 (0.47-2.84)  | 0.76     |
| <b>Third or higher generation cephalosporins</b>              | 1.67 (0.92-3.02)  | 0.09     |
| <b>Vancomycin</b>                                             | 2.06 (1.17-3.60)  | 0.01     |
| <b>Piperacillin-Tazobactam</b>                                | 0.81 (0.50-1.34)  | 0.42     |
| <b>Carbapenems</b>                                            | 1.39 (0.90-2.15)  | 0.14     |
| <b>Metronidazole</b>                                          | 0.92 (0.55-1.53)  | 0.74     |
| <b>Clindamycin</b>                                            | 0.56 (0.27-1.16)  | 0.12     |
